# Supplementary material
Source: PubMed Central journal article supplement (PMC4579452)
Supplement: AEM.02033-15_zam999116658so1.pdf [file AEM.02033-15_zam999116658so1.pdf]

1 **Supplemental figures**

2

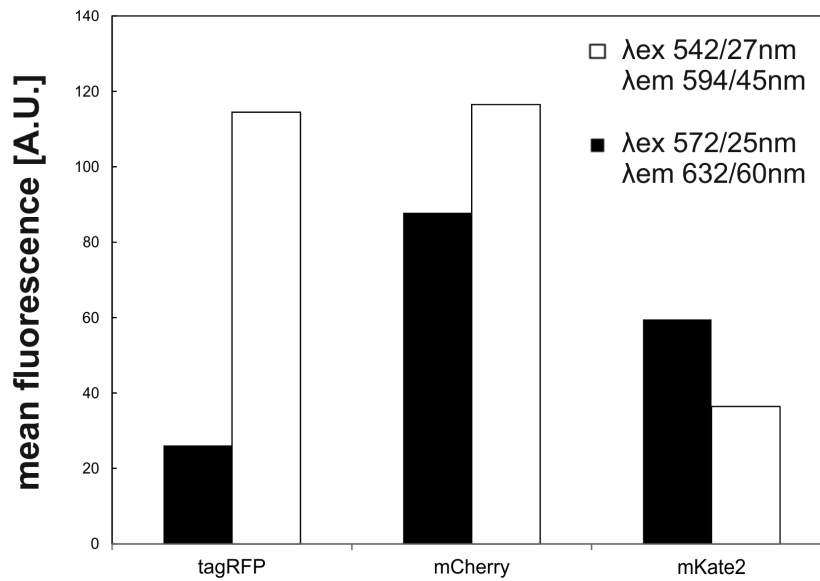

3

4

5 **Fig. S1. Comparison of competence-regulated RFP fluorescence intensities.**

6 Cells of strain carrying  $P_{ssbB}$ -RFP were grown in C+Y medium, and induced at OD600  
7 0.05 with CSP (1  $\mu$ g/ml) and analyzed after 1.5h. Average fluorescence intensities at  
8 the single cell level measured by fluorescence microscopy using an mCherry filterset,  
9 polychroic mirror QUAD2 (■) or a tritc filter set; polychroic mirror QUAD1 (□). Values  
10 are in arbitrary units [A.U.]. Single cell fluorescence levels were determined using  
11 MicrobeTracker (1).

12

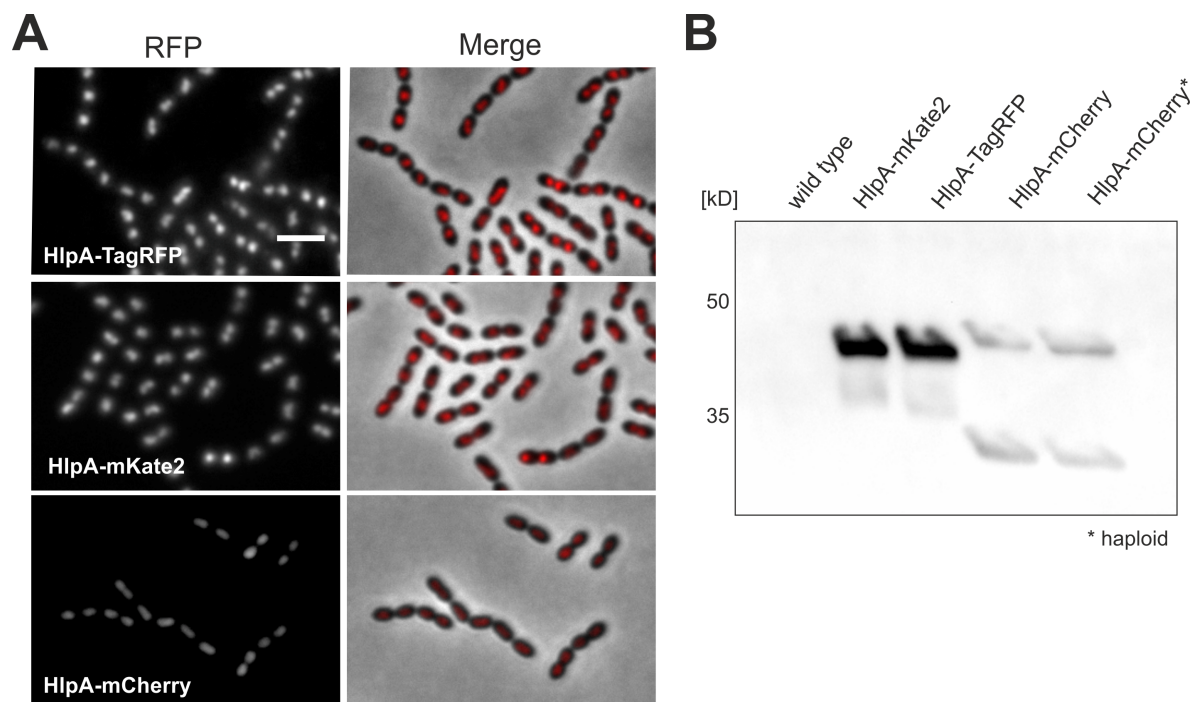

13

14

15 **Fig. S2. Comparison of tagRFP, mCherry and mKate2 in a C-terminal protein**  
 16 **fusion to the histone-like protein HlpA. (A)** Non-deconvolved, unprocessed  
 17 micrographs of merodiploid D39 strains expressing HlpA-TagRFP (KB1-65), HlpA-  
 18 mKate2 (MK119) and HlpA-mCherry (MK218), respectively. Scale bar equals 2  $\mu$ m.  
 19 The filter sets TRITC for HlpA-TagRFP or mCherry for HlpA-mKate2 and HlpA-  
 20 mCherry were used. **(B)** Immunodetection of fusion proteins in whole cell extracts of  
 21 strains KB1-65 (*hlpA*, *hlpA-tagRFP*), MK119 (*hlpA*, *hlpA-mKate2*), MK218 (*hlpA*,  
 22 *hlpA-mCherry*) and KB1-64 (*hlpA-mCherry*) using anti-RFP antibodies.

23

24

25 **Supplementary references**

26

- 27 1. **Sliusarenko O, Heinritz J, Emonet T, Jacobs-Wagner C.** 2011. High-  
28 throughput, subpixel precision analysis of bacterial morphogenesis and  
29 intracellular spatio-temporal dynamics. *Mol Microbiol* **80**: 612–627.

30

31
